# Supplementary material for: In vitro topological loading of bacterial condensin MukB on DNA, preferentially single-stranded DNA rather than double-stranded DNA
Source: PubMed Central journal article supplement (PMC4937444; doi:10.1038/srep29469), 2016-07-08
Supplement: srep29469-s1.pdf [file srep29469-s1.pdf]

## Supplementary Information

### ***In vitro* topological loading of bacterial condensin MukB on DNA, preferentially single-stranded DNA rather than double-stranded DNA**

Hironori Niki<sup>1, 2, \*</sup> and Koichi Yano<sup>1</sup>

<sup>1</sup> Microbial Genetics Laboratory, Genetic Strains Research Center,  
National Institute of Genetics  
1111, Yata, Mishima, Shizuoka, Japan. 411-8540

<sup>2</sup> Department of Genetics, SOKENDAI (The Graduate University for Advanced  
Studies)  
1111, Yata, Mishima, Shizuoka, Japan. 411-8540

\*To whom correspondence should be addressed.

### Purification of histidine-tagged Muk proteins

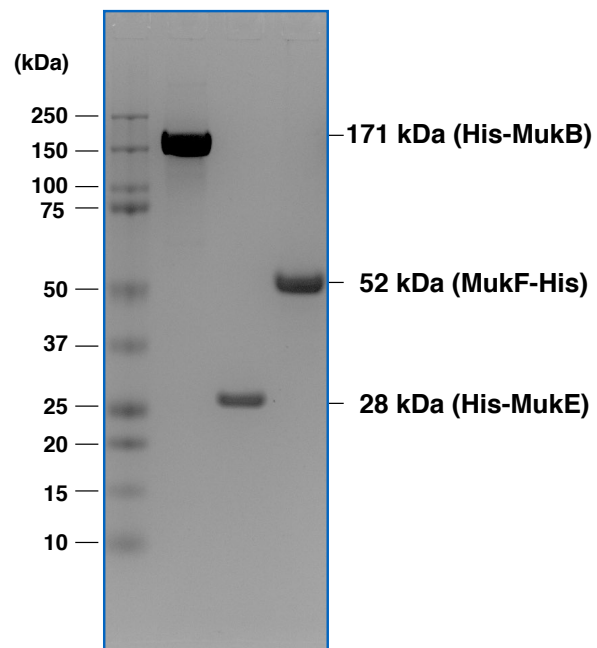

Supplementary Fig. S1

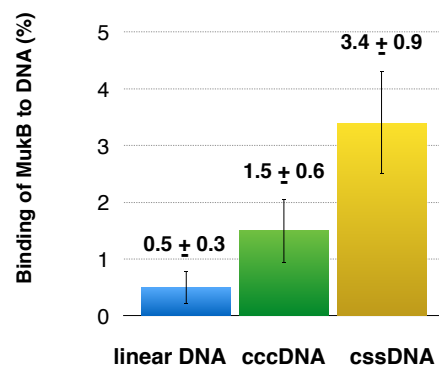

**Supplementary Fig. S2**

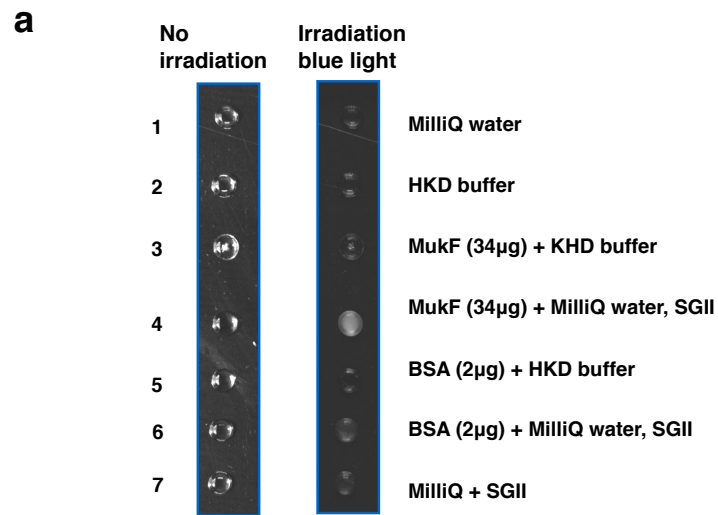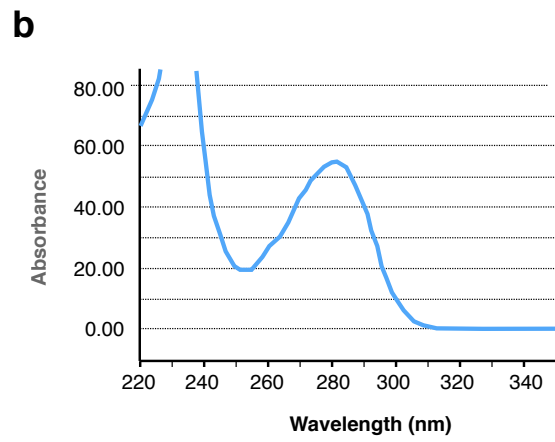

**Supplementary Fig. S3**

**Extended Data Fig. S1 SDS polyacrylamide gel electrophoresis**

Purified histidine-tagged proteins, MukB, MukE, and MukF were analyzed by using SDS polyacrylamide gel electrophoresis. Each lane was loaded on 36.5 pmol of the purified histidine-tagged proteins. Proteins in the gel were stained by Coomassie Brilliant Blue R-250.

**Supplementary Fig. S2 In vitro loading of MukB onto DNA**

Quantification of retrieved DNA by the MU assay. The means and standard deviations were calculated from three independent experiments. The lot number of histidine-tagged MukB used in this experiment was different from that of the purified protein used in the experiments of Fig. 3b.

**Extended Data Fig. S3 Fluorescence and absorbance spectrum of MukF**

**a**, The fluorescence of solutions (10  $\mu$ l) was detected. **b**, The absorbance spectrum of a solution including MukF (34  $\mu$ g) was measured by using a spectrophotometer (NanoDrop ND-1000).
